# Supplementary material
Source: publisher figshare collection journal article supplement (https://acs.figshare.com/ndownloader/files/9039019)
Supplement: Supplementary file 1 [file 9039019]

# Controlling the heat dissipation in temperature-matched plasmonic nanostructures

Alessandro Alabastri,<sup>\*,†</sup> Mario Malerba,<sup>‡,&</sup> Eugenio Calandrini,<sup>‡,&</sup> Alejandro Manjavacas,<sup>⊥</sup>

Francesco De Angelis,<sup>‡</sup> Andrea Toma,<sup>‡</sup> and Remo Proietti Zaccaria<sup>\*,#,‡</sup>

<sup>†</sup>Department of Physics and Astronomy and Department of Electrical and Computer Engineering, Rice University, 6100 Main Street, Houston, Texas 77005, United States

<sup>‡</sup>Istituto Italiano di Tecnologia, via Morego 30, 16163 Genova, Italy

<sup>⊥</sup>Department of Physics and Astronomy, University of New Mexico, Albuquerque, New Mexico 87131, United States

<sup>#</sup>Cixi Institute of Biomedical Engineering, Ningbo Institute of Materials Technology and Engineering, Chinese Academy of Sciences, Ningbo 315201, China

<sup>&</sup>These authors contributed equally to this work.

\*Corresponding authors: Alessandro.Alabastri@rice.edu; Remo.Proietti@iit.it

## Supporting Information

### Comparison between classical and plasmonic matching

In classical antenna theory, when a terminating impedance ( $Z_T$ ) is applied to a receiving antenna (e.g. a dipole antenna) the current flowing through the equivalent circuit is<sup>1</sup>:

$$I = \frac{V}{Z_T + Z_A} \quad (1)$$

where  $V$  and  $Z_A$  are the voltage and impedance of the equivalent Thévenin generator describing the antenna. We can expand the impedances into their real (resistance,  $R$ ) and imaginary (reactance,  $X$ ) parts as  $Z_T = R_T + jX_T$  and  $Z_A = R_A + jX_A$ . Here  $R_A$  accounts from all the power losses from the antenna system and can be thus further decomposed into radiation resistance  $R_s$  (related to the reradiated power from the antenna) and loss resistance  $R_L$  (related to the actual dissipation into heat in the antenna). The *matching* condition refers to the case when the power ( $P_T$ ) absorbed by the terminating load ( $R_T$ ) is maximized. This power can be written as:

$$P_T = \frac{V^2 R_T}{(R_s + R_L + R_T)^2 + (X_A + X_T)^2} \quad (2)$$

and it is maximized (antenna *matched*) when the resistances are *matched*,  $R_T = R_s + R_L$  and the reactances cancel out,  $X_T = -X_A$ . While the latter condition sets the system antenna/terminating impedance in resonance, the former is what constitutes the *matching* between antenna and terminal resistances allowing for the transferring of the maximum possible amount of power from the antenna to the load ( $R_T$ ). Generally, both  $X_T$  and  $R_T$  belong to a transmission line and they can be tuned to reach the *matching* condition.

In the case of plasmonic nanoantennas investigated in this work, the idea is to reach the *matching* condition without introducing any external terminating impedance ( $Z_T = 0$ ). In particular, by exploiting both the fundamental plasmon resonance and the temperature dependence damping factor one can reach the *temperature-matched* condition within the nanoantennas itself. In fact by targeting heat maximization within the nanoantenna, one can modify Eq. (2) as:

$$P_L = \frac{V^2 R_L(T)}{(R_s + R_L(T))^2 + (X_A)^2} \quad (3)$$

where  $R_L(T)$  is the antenna resistance that includes the temperature effect given by  $\Gamma_{e-ph}(T)$  and  $X_A$  represents the reactance of the antenna which is embedded in a background medium (vacuum, air etc.). Furthermore, by modelling the nanoantenna as a nanocircuit,<sup>2-4</sup> at the plasmonic resonance  $\omega_0 = 1/\sqrt{LC}$ , the quantity  $X_A = 1/\omega C - \omega L = 0$  which indeed minimizes the total reactance. Finally, the second requirement which needs to be fulfilled in order to reach the *matching* condition is all about the resistances. In this work we show that, by modifying the temperature, it is possible to achieve  $R_s = R_L(T)$  thus allowing maximum dissipation into the *temperature-matched* nanoantenna.

### Derivative of absorption and scattering efficiencies with respect to absorption damping

At resonance the derivatives are:

$$\begin{aligned} \frac{\partial \sigma_a}{\partial \Gamma_a} &= \frac{1}{\sigma_g} \left( \frac{N m_e e^2}{c \epsilon_0} \right) \frac{N \Gamma_s \omega_0^2 - m_e \Gamma_a}{(N \Gamma_s \omega_0^2 + m_e \Gamma_a)^3} \\ \frac{\partial \sigma_s}{\partial \Gamma_a} &= \frac{1}{\sigma_g} \left( \frac{2 N^2 m_e e^2}{c \epsilon_0} \right) \frac{\Gamma_s \omega_0^2}{(N \Gamma_s \omega_0^2 + m_e \Gamma_a)^3} \end{aligned} \quad (4)$$

## Electron-phonon scattering term dependence on temperature

The complete non-linear expression of the electron-phonon scattering term can be derived assuming free electrons without Umklapp collisions and a single Debye model phonon spectrum as<sup>5-6</sup>:

$$\Gamma_{e-ph} = \Gamma_0 \left[ \frac{2}{5} + \frac{4T^5}{\theta_D^5} \int_0^{\theta_D/T} \frac{z^4}{e^z - 1} dz \right] \quad (5)$$

Where  $\theta_D = 170$  K is the gold Debye temperature and  $\Gamma_0 = 0.015$  eV, value that well agrees with McKay and Rayne<sup>7</sup> who estimated a  $\tau_0 = 1/\Gamma_0$  of  $\approx 30$  fs, corresponding to  $\Gamma_0 \approx 0.02$  eV. We can explain this modest discrepancy through the use, in our work, of thin gold films<sup>8</sup> and to a larger Debye temperature (185K) employed by McKay and Rayne in their calculations that partially offsets the increase of  $\Gamma_0$ . By considering the case where  $T \gg \theta_D$  we obtain  $\frac{z^4}{e^z - 1} \approx z^3$ , where the first order

Taylor term centred at zero is adopted. This leads to:

$$\Gamma_{e-ph} = \Gamma_0 \left[ \frac{2}{5} + \frac{4T^5}{\theta_D^5} \int_0^{\theta_D/T} \frac{z^4}{e^z - 1} dz \right] \approx \Gamma_0 \left[ \frac{2}{5} + \frac{4T^5}{\theta_D^5} \frac{1}{4} \frac{\theta_D^4}{T^4} \right] = \Gamma_0 \left[ \frac{2}{5} + \frac{T}{\theta_D} \right] \approx \Gamma_0 \frac{T}{\theta_D} \quad (6)$$

This result clearly shows that in high temperature regime  $\Gamma_{e-ph} \propto T$ . Importantly, this relation is coherent with the linear dependence of metals resistivity with temperature<sup>9</sup>. In physical terms for  $T > \theta_D$  all phonon modes are occupied and thus a linear model can be derived<sup>10-11</sup>:

$$\Gamma_{e-ph} = \lambda \pi \frac{k_B T}{\hbar} \quad (7)$$

where  $\lambda$  is a metal dependent constant.

## Absorption and scattering efficiency vs. damping using the complete Au dielectric function

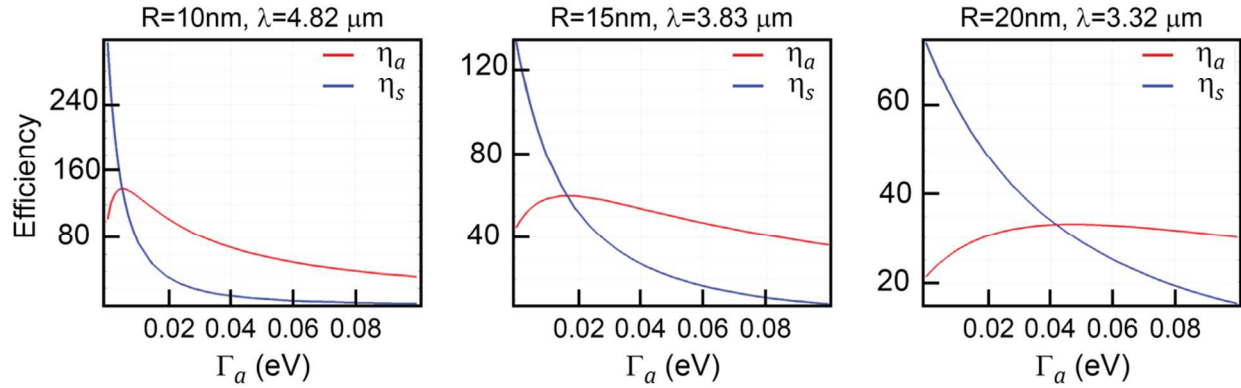

Figure S1. Absorption (red) and scattering (blue) efficiencies from numerical simulations depending on the absorption damping coefficient  $\Gamma_a$  for Au rods (Drude-Lorentz model) in air ( $n = 1$ ) with height  $H = 1\ \mu\text{m}$  and radius of base  $R = 10, 15, 20\ \text{nm}$  respectively at their resonant wavelength:  $4.35\ \mu\text{m}$ ,  $3.52\ \mu\text{m}$  and  $3.17\ \mu\text{m}$ . At  $\Gamma_a = 0$ , absorption is given from the residual effect of interband transitions on the imaginary part of the Au dielectric function.

## Dependence of absorption density on damping: H-AR and L-AR cases

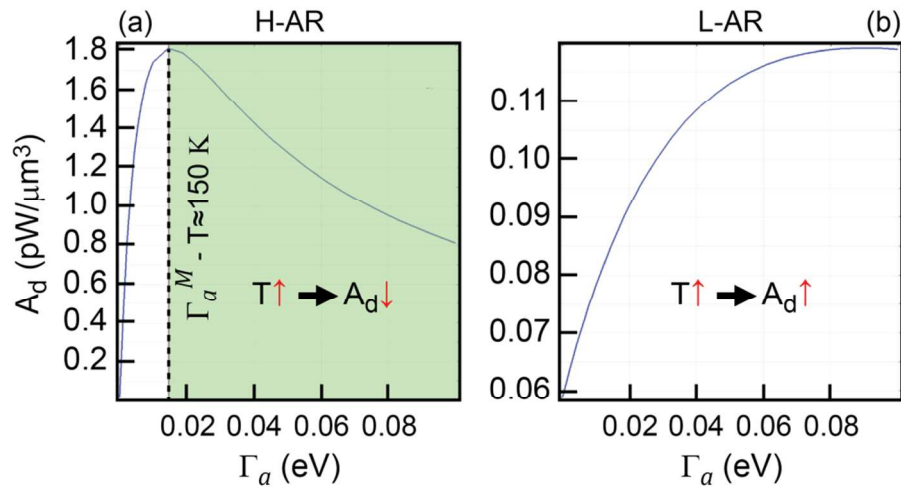

Figure S2. Absorption density as obtained from numerical simulations depending on the absorption damping coefficient  $\Gamma_a$  for experimental (a) H-AR and (b) L-AR antennas in air using the Drude-Lorentz model for Au permittivity. In (a) the shadow area represents the situation where an increase of temperature implies a decrease of

the absorption density. The dashed line highlights the threshold value  $\Gamma_a^M$  for the H-AR antenna as defined in Figure 3, corresponding to about 150 K. Vice-versa, in( b) the absorption density increases with the temperature for all considered range of  $\Gamma_a$ .

### Dependence of field enhancement on temperature: H-AR and L-AR cases

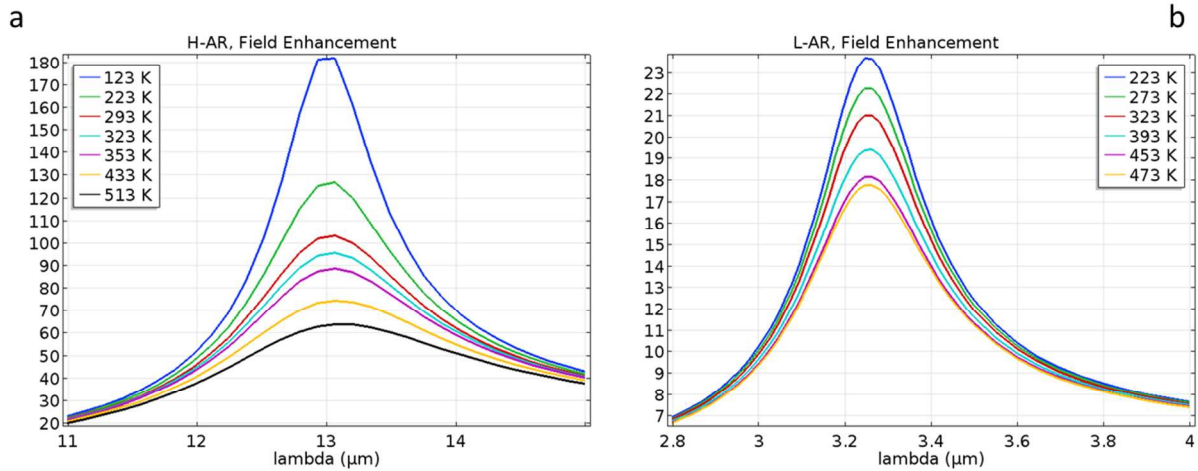

Figure S3. Field enhancement calculated at 1 nm above the edge as function of the temperature for (a) H-AR and (b) L-AR antennas. The surrounding medium is air. The temperature dependent Drude-Lorentz model for Au permittivity was employed for these calculations. A temperature (T) increase always leads to lower field enhancements as long as the imaginary part of the permittivity increases with T.

### Dependence of reflectivity on temperature cycling

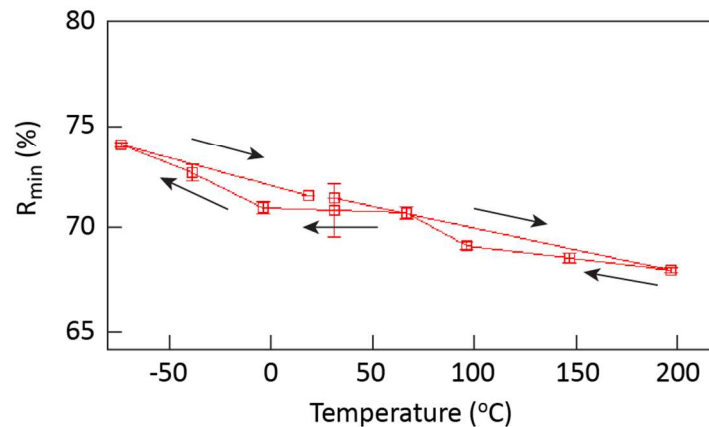

Figure S4. Example of reflectivity measurements (minimum of reflectivity) obtained by cycling the temperature starting from room temperature ( $\sim 25\text{ }^{\circ}\text{C}$ ). The black arrows indicates how the temperature was tuned: from room temperature down to negative temperature up to  $200\text{ }^{\circ}\text{C}$ . Importantly, no evident change in the reflectivity was found. In this example a low aspect ratio set of antennas was employed.

### Supporting Information references

- (1) Kraus, J. D.; Marhefka, R. J.; *Antennas for all applications*. McGraw-Hill, **2002**.
- (2) Staffaroni, M.; Conway, J.; Vedantam, S.; Tang, J.; Yablonovitch, E. Circuit analysis in metal-optics. *Photonics and Nanostructures - Fundamentals and Applications* **2012**, *10*, 166-176.
- (3) Engheta, N.; Salandrino, A.; Alù, A. Circuit Elements at Optical Frequencies: Nanoinductors, Nanocapacitors, and Nanoresistors. *Phys. Rev. Lett.* **2005**, *95*, 095504.
- (4) Huang, J. S.; Feichtner, T.; Biagioni, P.; Hecht, B. Impedance Matching and Emission Properties of Nanoantennas in an Optical Nanocircuit. *Nano Lett.* **2009**, *9*, 1897-1902.
- (5) Holstein, T. Optical and Infrared Volume Absorptivity of Metals. *Phys. Rev.* **1954**, *96*, 535-536.
- (6) Holstein T. Theory of transport phenomena in an electron-phonon gas. *Ann. Phys.* **1964**, *29*, 410-535.
- (7) McKay, J. A.; Rayne, J. A. Temperature dependence of the infrared absorptivity of the noble metals. *Phys. Rev. B* **1976**, *13*, 673-685.
- (8) Reddy, H.; Guler, U.; Kildishev, A. V.; Boltasseva, A.; Shalaev, V. M. Temperature-dependent optical properties of gold thin films. *Optical Materials Express* **2016**, *6*, 2776-2802.
- (9) Ashcroft, N. W.; Mermin, N. D. *Solid State Physics*. USA: BROOKS/COLE CENGAGE Learning, **1976**.
- (10) Konrad, A.; Wackenhut, F.; Hussels, M.; Meixner, A. J.; Brecht, M. Temperature Dependent Luminescence and Dephasing of Gold Nanorods. *J. Phys. Chem. C* **2013**, *117*, 21476-21482.
- (11) Kittel, C. *Introduction to solid state physics*. Hoboken, NJ: Wiley, **2005**.
